# Supplementary material for: Predictors of Incarceration Among Urban Adults With Co-Occurring Severe Mental Illness and a Substance Use Disorder
Source: Atypon-hosted journal article supplement (doi:10.1176/appi.ps.201300408), 2014-07-15
Supplement: appi.ps.201300408.ds001.pdf [file appi.ps.201300408.ds001.pdf]

**Appendix**

Logistic regression models of predictors of incarceration over a three-year follow-up among participants with co-occurring disorders<sup>a</sup>

| Variable                                                    | Initial Model |           |       | Final Model |           |       |
|-------------------------------------------------------------|---------------|-----------|-------|-------------|-----------|-------|
|                                                             | OR            | 95% CI    | p     | OR          | 95% CI    | p     |
| Age                                                         | .96           | .92-1.02  | .18   | .96         | .91-1.02  | .15   |
| Male (reference: female)                                    | 1.01          | .42-2.40  | .99   | .98         | .37-2.59  | .97   |
| Race-ethnicity (reference: white)                           |               |           |       |             |           |       |
| Hispanic                                                    | 1.83          | .70-4.77  | .22   | 1.67        | .61-4.59  | .32   |
| African American                                            | 1.16          | .32-4.23  | .83   | .81         | .20-3.22  | .76   |
| Other                                                       | .22           | .17-2.80  | .24   | .08         | .01-1.30  | .08   |
| Psychotic disorder (reference: mood disorder)               | .82           | .28-2.39  | .72   | .97         | .31-3.09  | .96   |
| Prior incarceration (reference: none)                       | 3.55          | 1.57-8.02 | .002  | 3.26        | 1.38-7.71 | .007  |
| Homeless (reference: none)                                  | 1.87          | .89-3.94  | .10   | 2.21        | .99-4.93  | .06   |
| Substance Abuse Treatment Scale                             | .61           | .47-.80   | <.001 | .60         | .45-.79   | <.001 |
| Employment (reference: none)                                | ---           | ---       | ---   | .77         | .32-1.89  | .57   |
| Social contact with nonuser of substances (reference: none) | ---           | ---       | ---   | .19         | .08-.43   | <.001 |

<sup>a</sup> For the initial model without employment or social contact: N=170, -2 log likelihood=172.704. For the final model with employment and social contact included: N=170, -2 log likelihood=154.709. Change in model fit:  $\chi^2=17.99$ ,  $df=2$ ,  $p<.001$
